# Supplementary material
Source: Springer Nature journal article supplement (https://www.springermedizin.de/resource/supplementary/12958_2014_1225_MOESM4_ESM.pdf/9567100)

Cell lysates

Condition media

BT-C

BT-K

BT-C (up)

BT-C (lo)

BT-K (up)

BT-K (lo)

28 kDa

26 kDa

28 kDa

26 kDa

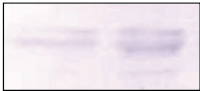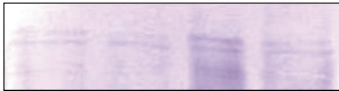

Supplement: MOESM4 [file 9567100]
